# Supplementary material for: IL-1β Is Upregulated in the Diabetic Retina and Retinal Vessels: Cell-Specific Effect of High Glucose and IL-1β Autostimulation
Source: PubMed Central journal article supplement (PMC3353989; doi:10.1371/journal.pone.0036949), 2012-05-16
Supplement: pone.0036949.s001.pdf [file pone.0036949.s001.pdf]

**Table S1. Primers and probe sets for RealTime RT-PCR analysis of IL-1 $\beta$  in BREC.**

| <b>Primers/probe set</b> |         |                                       | <b>Reference Sequence</b> |
|--------------------------|---------|---------------------------------------|---------------------------|
| bovine IL-1 $\beta$      | forward | 5'-TCC ACC TCC TCT CAC AGG AAA-3'     | NM_173979                 |
|                          | reverse | 5'-CTC TCC TTG CAC AAA GCT CAT G-3',  |                           |
|                          | probe   | 5'FAM-CAC CAC TTC TCG GTT CA-MGB3'    |                           |
| bovine $\beta$ -actin    | forward | 5'-AAA TGC TTC TAG GCG GAC TGT TAG-3' | NM_174039                 |
|                          | reverse | 5'-TTC TGC GCAAGT TAG GTT TTG TC-3'   |                           |
|                          | probe   | 5'FAM-CTG CGT TAC ACC CTT T-MGB3'     |                           |
