# Supplementary material for: IL-1β Is Upregulated in the Diabetic Retina and Retinal Vessels: Cell-Specific Effect of High Glucose and IL-1β Autostimulation
Source: PubMed Central journal article supplement (PMC3353989; doi:10.1371/journal.pone.0036949), 2012-05-16
Supplement: pone.0036949.s004.pdf [file pone.0036949.s004.pdf]

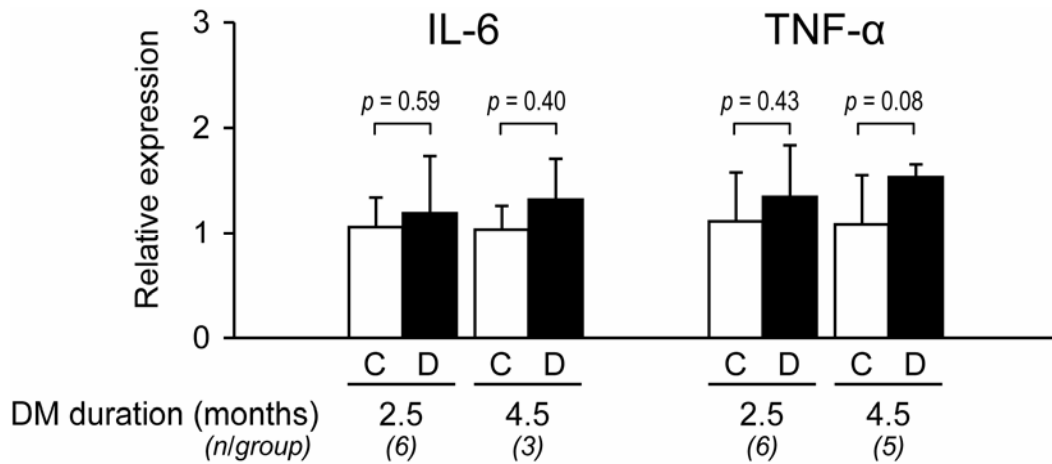

**Figure S3. Diabetes does not alter the expression of IL-6 and TNF- $\alpha$  in the retina.** All experiments were conducted in STZ-diabetic (D) and age-matched control (C) rats. IL-6 and TNF- $\alpha$  mRNA levels were quantified by RealTime RT-PCR as described in Methods. Bars represent mean  $\pm$  SD of the results obtained in the indicated number of rats at each time point tested.
